# Supplementary material for: Free Faecal Water: Analysis of Horse Faecal Microbiota and the Impact of Faecal Microbial Transplantation on Symptom Severity
Source: MDPI journal article supplement (doi:10.3390/ani11102776), 2021-09-23
Supplement: s1 [file s1]

# **Free Faecal Water: Analysis of Horse Faecal Microbiota and the Impact of Faecal Microbial Transplantation on Symptom Severity**

**Louise Laustsen <sup>1</sup>, Joan E. Edwards <sup>2\*</sup>, Gerben D.A. Hermes <sup>2</sup>, Nanna Lúthersson <sup>3</sup>, David A. van Doorn <sup>4,5</sup>, Supattra Okrathok <sup>2,6</sup>, Theresa J. Kujawa <sup>5,7</sup> and Hauke Smidt <sup>2\*</sup>**

<sup>1</sup> Department of Veterinary Education, Institute of Veterinary Science, University of Liverpool, Neston, CH64 7TE, UK; vetlouiselaustsen@gmail.com

<sup>2</sup> Laboratory of Microbiology, Wageningen University & Research, Wageningen, The Netherlands; gerben.hermes@wur.nl (G.D.A.H.); s.okrathok@gmail.com (S.O.)

<sup>3</sup> Hestedoktoren, Kirke Eskilstrup, Denmark; nanna@hestedoktoren.dk

<sup>4</sup> Department of Clinical Sciences, Equine Health, Utrecht University, Utrecht, The Netherlands; d.a.vandoorn1@uu.nl

<sup>5</sup> Department of Population Health Science, Farm Animal Health, Utrecht University, Utrecht, The Netherlands; theresa.k2k@gmail.com

<sup>6</sup> School of Animal Technology and Innovation, Institute of Agricultural Technology, Suranaree University of Technology, Nakhon Ratchasima 30000, Thailand

<sup>7</sup> Animal Nutrition Group, Wageningen University & Research, Wageningen, The Netherlands.

\* Correspondence: joanee2002@hotmail.com (J.E.E.); hauke.smidt@wur.nl (H.S.)

**Table S1.** Summary of diagnostic analysis by the FFW horse's own veterinarian, previous FFW treatments and travel time to the clinic for FMT.

| Patient Code | Diagnostic Analysis  |                               |             |               |             |                |           | Previous FFW Treatments |             |          |                        | Other Treatments <sup>a</sup>                                      | Travel Time to Clinic for FMT<br>(hours) |
|--------------|----------------------|-------------------------------|-------------|---------------|-------------|----------------|-----------|-------------------------|-------------|----------|------------------------|--------------------------------------------------------------------|------------------------------------------|
|              | Abdominal Ultrasound | Abdominal Explorative Surgery | Gastroscopy | Rectal Biopsy | Rectal Exam | Blood Analysis | Parasites | Dietary Change          | Antibiotics | Steroids | Absorptive Supplements |                                                                    |                                          |
| P1           | N                    | N                             | N           | N             | Y           | Y              | Y         | Y                       | N           | N        | Y                      | -                                                                  | 1.0                                      |
| P2           | Y                    | N                             | N           | N             | Y           | Y              | Y         | Y                       | N           | N        | Y                      | NSAID due to hoof problem/pain                                     | 2.5                                      |
| P3           | Y                    | N                             | Y           | N             | Y           | Y              | Y         | Y                       | N           | N        | Y                      | NSAIDS for colic, omeprazol for EGUS and antibiotics after surgery | 2.5                                      |
| P4           | Y                    | Y                             | Y           | N             | Y           | Y              | Y         | Y                       | Y           | Y        | Y                      | -                                                                  | 2.5                                      |
| P5           | N                    | N                             | N           | N             | Y           | Y              | Y         | Y                       | N           | N        | Y                      | NSAID due to lameness                                              | 0.5                                      |
| P6           | Y                    | N                             | Y           | N             | Y           | Y              | Y         | Y                       | Y           | N        | Y                      | -                                                                  | 1.0                                      |
| P7           | N                    | N                             | N           | N             | Y           | Y              | Y         | Y                       | NK*         | N        | Y                      | -                                                                  | 1.0                                      |
| P8           | N                    | N                             | N           | N             | Y           | Y              | Y         | Y                       | N           | N        | Y                      | -                                                                  | 1.0                                      |
| P9           | N                    | N                             | N           | N             | Y           | Y              | Y         | Y                       | N           | N        | Y                      | -                                                                  | 0.5                                      |
| P10          | N                    | N                             | N           | N             | Y           | Y              | Y         | Y                       | N           | N        | Y                      | -                                                                  | 1.0                                      |

\*NK, not known

# NSAID, non-steroidal anti-inflammatory drug; EGUS, equine gastric ulcer syndrome

**Table S2.** Details of all the free faecal water (P), control (C), and faecal donor (D) horses used in the study.

| Horse Code | Age (years) | Type <sup>†</sup> | Sex      | Purpose*              | Forage  | Concentrate kg/day | Beddings <sup>s</sup> | Herd Hierarchy <sup>+</sup> | Turnout <sup>^</sup> (hours/day) |
|------------|-------------|-------------------|----------|-----------------------|---------|--------------------|-----------------------|-----------------------------|----------------------------------|
| P1         | 21          | WB Horse          | Gelding  | Recreational          | Haylage | 0.85               | Straw                 | Medium                      | 8                                |
| C1         | 10          | WB Horse          | Mare     | Breeding              | Haylage | 1.50               | Straw                 | High                        | 8                                |
| P2         | 8           | Sports Pony       | Gelding  | HI Dressage           | Haylage | 1.70               | Straw                 | Medium                      | 2                                |
| C2         | 10          | Sports Pony       | Gelding  | HI Dressage           | Haylage | 0.30               | Straw                 | Medium                      | 2                                |
| P3         | 9           | Sports Pony       | Gelding  | Dressage              | Hay     | 0.70               | Straw                 | Medium                      | 0                                |
| C3         | 6           | Sports Pony       | Mare     | Dressage              | Hay     | 0.15               | Straw                 | Medium                      | 0                                |
| P4         | 8           | WB Horse          | Gelding  | Dressage              | Hay     | 2.45               | Shavings              | Medium                      | 7                                |
| C4         | 17          | WB Horse          | Gelding  | Dressage              | Hay     | 1.80               | Straw                 | High                        | 7                                |
| P5         | 7           | WB Horse          | Gelding  | Dressage              | Hay     | 0.53               | Shavings              | Medium                      | 8                                |
| C5         | 10          | WB Horse          | Gelding  | Dressage              | Haylage | No Data            | Shavings              | Medium                      | 8                                |
| P6         | 18          | WB Horse          | Gelding  | Dressage              | Hay     | 1.20               | Shavings              | High                        | 8                                |
| C6         | 17          | WB Horse          | Stallion | Dressage              | Hay     | 1.20               | Shavings              | High                        | 8                                |
| P7         | 7           | CB pony           | Gelding  | Pleasure              | Haylage | 1.20               | Straw                 | Medium                      | 7                                |
| C7         | 10          | Sports Pony       | Gelding  | Pleasure              | Haylage | 0.30               | Straw                 | Medium                      | 7                                |
| P8         | 6           | WB Horse          | Gelding  | Eventing/Show jumping | Haylage | 0.65               | Straw                 | Medium                      | 10                               |
| C8         | 4           | WB Horse          | Gelding  | Eventing/Show jumping | Haylage | 1.20               | Straw                 | Medium                      | 10                               |
| P9         | 12          | WB Horse          | Mare     | Dressage              | Hay     | 1.80               | Straw                 | Medium                      | 5                                |
| C9         | 11          | WB Horse          | Mare     | Dressage              | Hay     | 1.80               | Straw                 | Medium                      | 5                                |
| P10        | 9           | CB Pony           | Mare     | Carriage driving      | Hay     | 0.45               | Straw                 | Medium                      | 12                               |
| C10        | 14          | CB Pony           | Gelding  | Carriage driving      | Hay     | 0.45               | Straw                 | Medium                      | 12                               |

|    |    |          |      |              |         |      |          |        |   |
|----|----|----------|------|--------------|---------|------|----------|--------|---|
| DA | 17 | WB Horse | Mare | Recreational | Haylage | 1.00 | Shavings | Medium | 8 |
| DB | 15 | WB Horse | Mare | Recreational | Haylage | 1.00 | Shavings | Low    | 8 |

# WB, warmblood; CB, coldblood

\* HI: high intensity training

\$ All horses were individually boxed, and the type of bedding used is indicated.

+ Herd hierarchy is indicated for when the horses were turned out in a paddock with other horses.

^ Horses were turned out in a dirt paddock.

**Table S3.** Phylum composition of the faecal microbiota of control and FFW horses.

| Phylum (%)         | Control |      | Patient |      |
|--------------------|---------|------|---------|------|
|                    | Average | SEM  | Average | SEM  |
| Firmicutes         | 33.11   | 1.44 | 33.42   | 1.86 |
| Bacteroidetes      | 24.20   | 1.58 | 25.90   | 1.14 |
| Kiritimatiellaeota | 16.78   | 1.78 | 18.58   | 1.89 |
| Spirochaetes       | 14.51   | 1.30 | 13.37   | 1.67 |
| Fibrobacteres      | 7.15    | 1.84 | 4.47    | 1.11 |
| Actinobacteria     | 1.40    | 0.21 | 1.64    | 0.19 |
| Euryarchaeota      | 1.37    | 0.43 | 1.07    | 0.28 |
| Verrucomicrobia    | 0.57    | 0.15 | 0.64    | 0.19 |
| Cyanobacteria      | 0.31    | 0.14 | 0.29    | 0.10 |
| Proteobacteria     | 0.14    | 0.04 | 0.14    | 0.05 |
| Tenericutes        | 0.11    | 0.06 | 0.00    | 0.00 |
| Planctomycetes     | 0.05    | 0.03 | 0.03    | 0.02 |
| Lentisphaerae      | 0.02    | 0.02 | 0.00    | 0.00 |
| Not Annotated      | 0.29    | 0.12 | 0.46    | 0.19 |

**Table S4.** Body condition score (BCS) of the FFW horses at different days (d) throughout the study.

| Horse<br>Code | BCS  |      |      |      |      |      | Change in BCS relative to d-9 |      |      |      |      |
|---------------|------|------|------|------|------|------|-------------------------------|------|------|------|------|
|               | d-9  | d7   | d14  | d28  | d84  | d168 | d7                            | d14  | d28  | d84  | d168 |
| P1            | 5.0  | 5.0  | 5.0  | 5.0  | 5.0  | 5.0  | 0.0                           | 0.0  | 0.0  | 0.0  | 0.0  |
| P2            | 5.5  | 5.5  | 5.5  | 5.5  | 5.0  | 5.0  | 0.0                           | 0.0  | 0.0  | -0.5 | -0.5 |
| P3            | 5.5  | 6.0  | 5.5  | 5.5  | 5.5  | 5.5  | 0.5                           | 0.0  | 0.0  | 0.0  | 0.0  |
| P4            | 3.5  | 3.5  | 4    | 4.5  | 5    | 5    | 0.0                           | 0.5  | 1.0  | 1.5  | 1.5  |
| P5            | 5.5  | 5.0  | 5.0  | 5.0  | 5.0  | 5.0  | -0.5                          | -0.5 | -0.5 | -0.5 | -0.5 |
| P6            | 5.5  | 5.5  | 5.0  | 5.5  | 5.5  | 5.5  | 0.0                           | -0.5 | 0.0  | 0.0  | 0.0  |
| P7            | 7.0  | 7.0  | 7.0  | 7.5  | 7.0  | 5.5  | 0.0                           | 0.0  | 0.5  | 0.0  | -1.5 |
| P8            | 5.5  | 5.5  | 5    | 5.5  | 5.5  | 5.5  | 0.0                           | -0.5 | 0.0  | 0.0  | 0.0  |
| P9            | 6.5  | 6.0  | 6.0  | 6.0  | 6.0  | 7.5  | -0.5                          | -0.5 | -0.5 | -0.5 | 1.0  |
| P10           | 6.0  | 5.5  | 5.5  | 5.5  | 7.0  | 7.5  | -0.5                          | -0.5 | -0.5 | 1.0  | 1.5  |
| Mean          | 5.6  | 5.5  | 5.4  | 5.6  | 5.7  | 5.7  | -0.1                          | -0.2 | 0.0  | 0.1  | 0.0  |
| SEM           | 0.29 | 0.28 | 0.25 | 0.25 | 0.25 | 0.31 | 0.10                          | 0.11 | 0.15 | 0.21 | 0.30 |

(a) Procrustes Weighted UniFrac

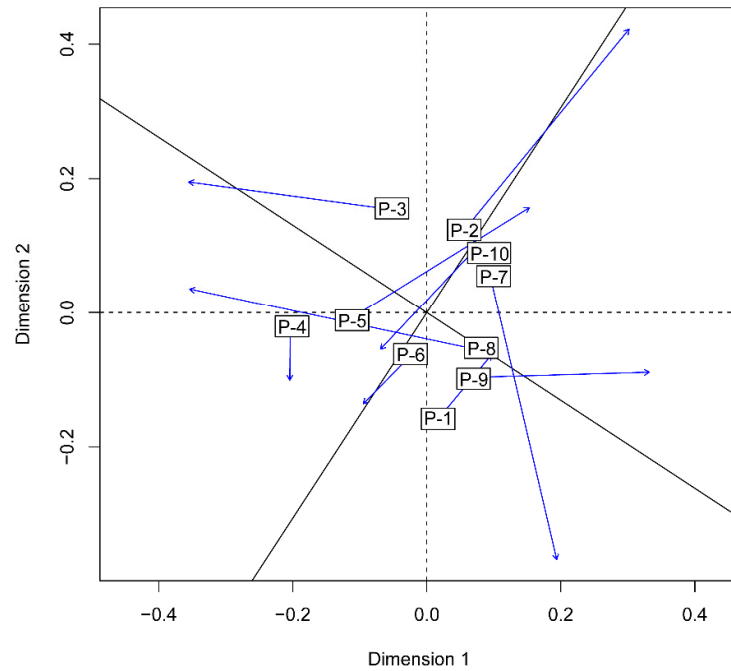

(b) Procrustes Unweighted UniFrac

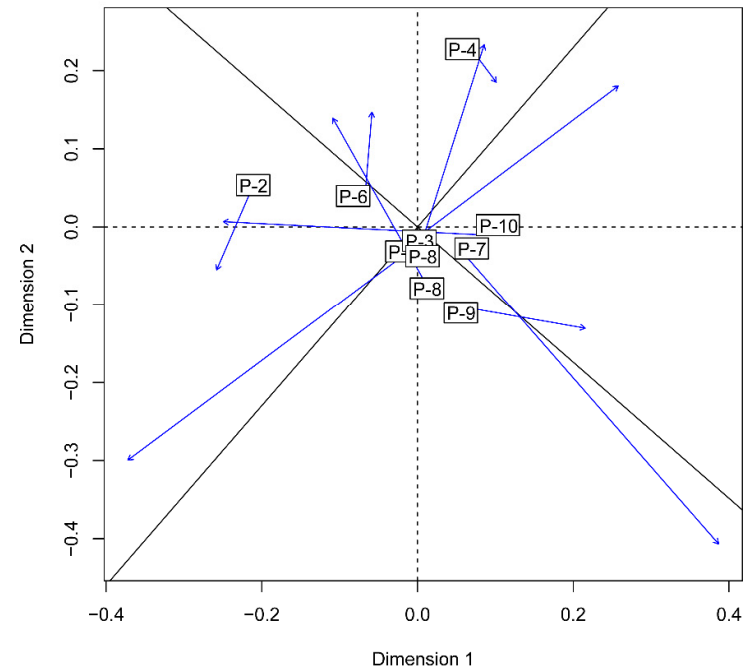

**Figure S1.** Procrustes analysis plots of faecal prokaryotic community composition data from FFW and control horses using weighted (a) and unweighted (b) UniFrac distances. Plots show a visual indication of the degree of match between the FFW and control horses ordinations. Labels show the position of the FFW horses ordination, and arrows point to their positions in the control horses ordination. The plot also shows the rotation between the two ordinations necessary to make them match as closely as possible.



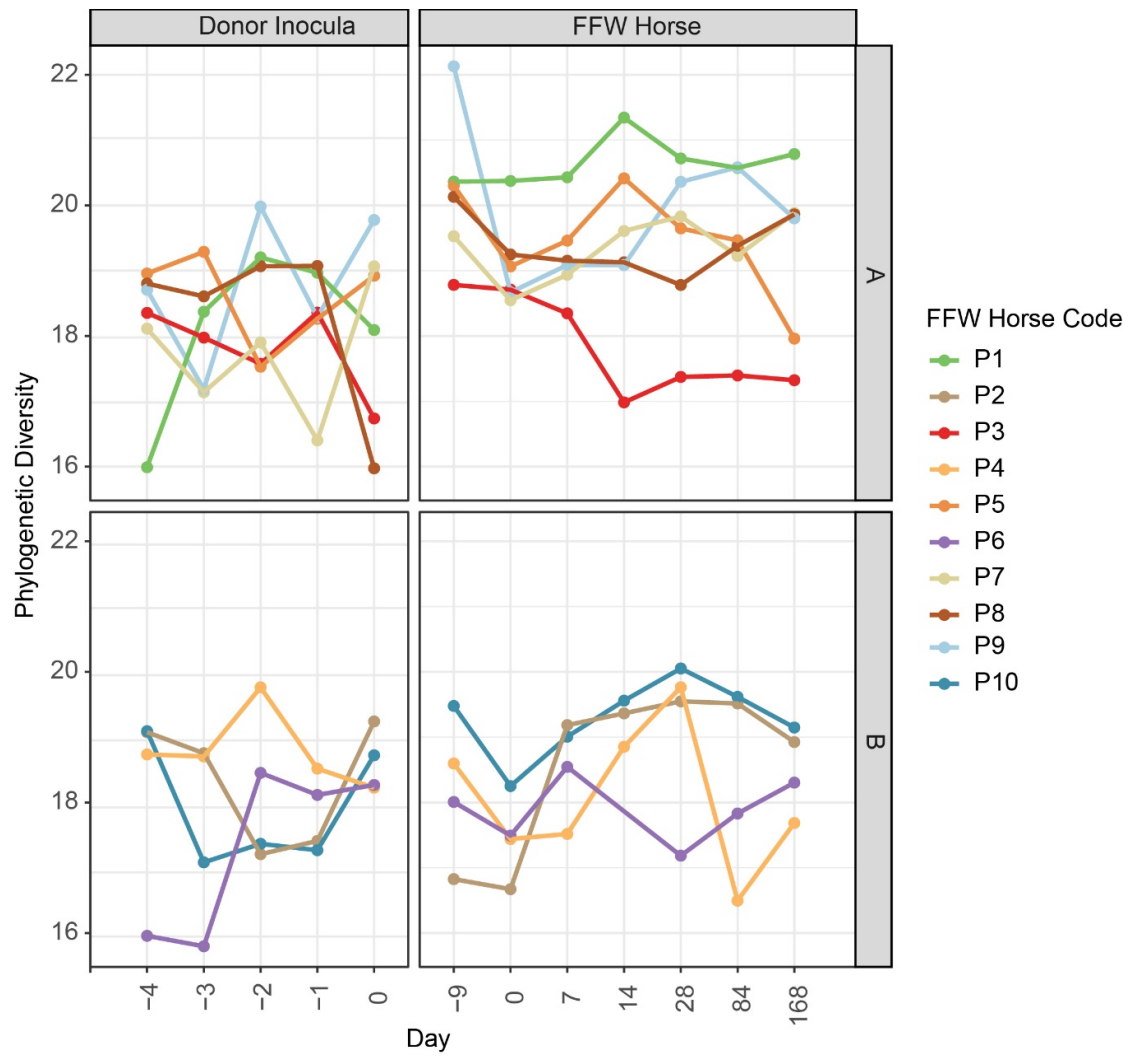

**Figure S2.** Alpha diversity values calculated using the Phylogenetic Diversity metric for donor inocula and FFW horse faecal microbiota samples. Donor inocula samples are colored by the animal that received them, and all FFW horse related samples are grouped by donor animal used (i.e., donor A or B).

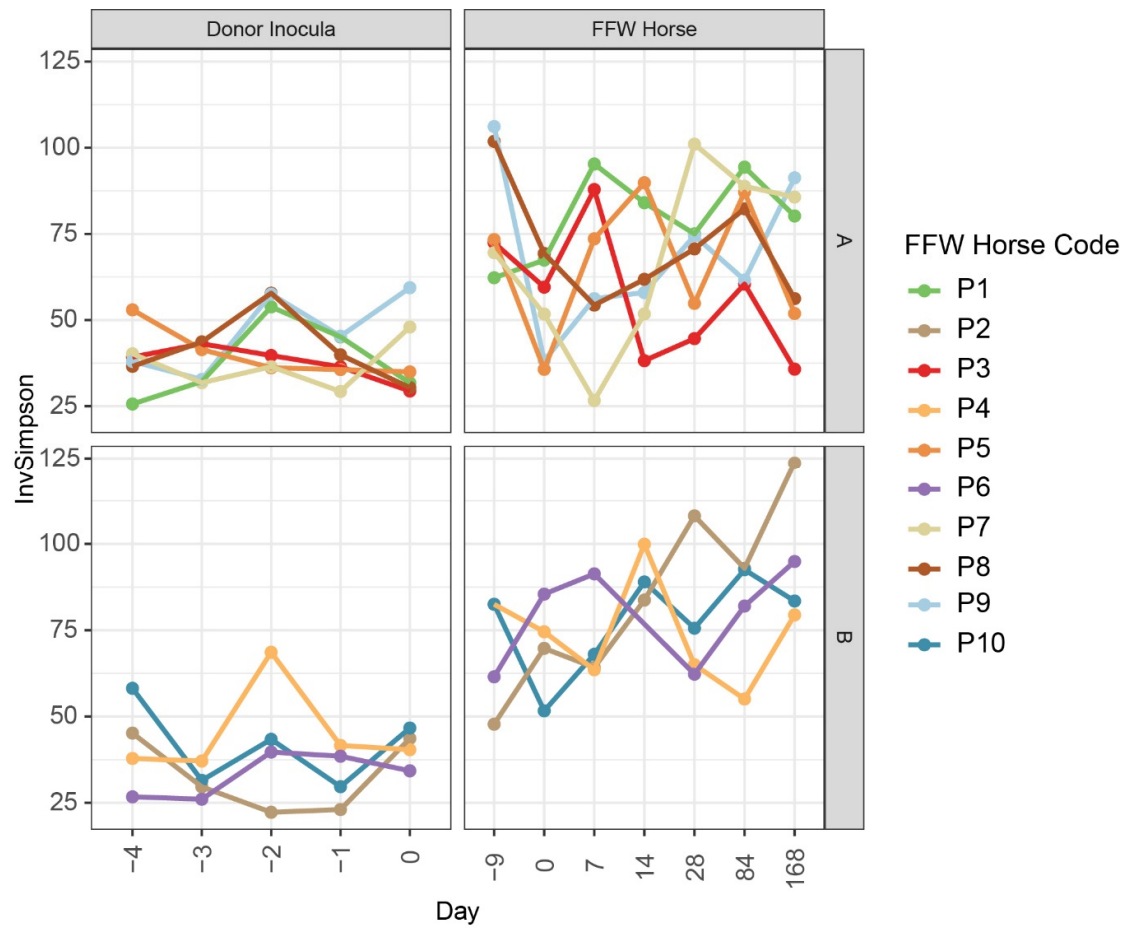

**Figure S3.** Alpha diversity values calculated using the InvSimpson metric for donor inocula and FFW horse faecal microbiota samples. Donor inocula samples are colored by the animal that received them, and all FFW horse related samples are grouped by donor animal used (i.e., donor A or B).

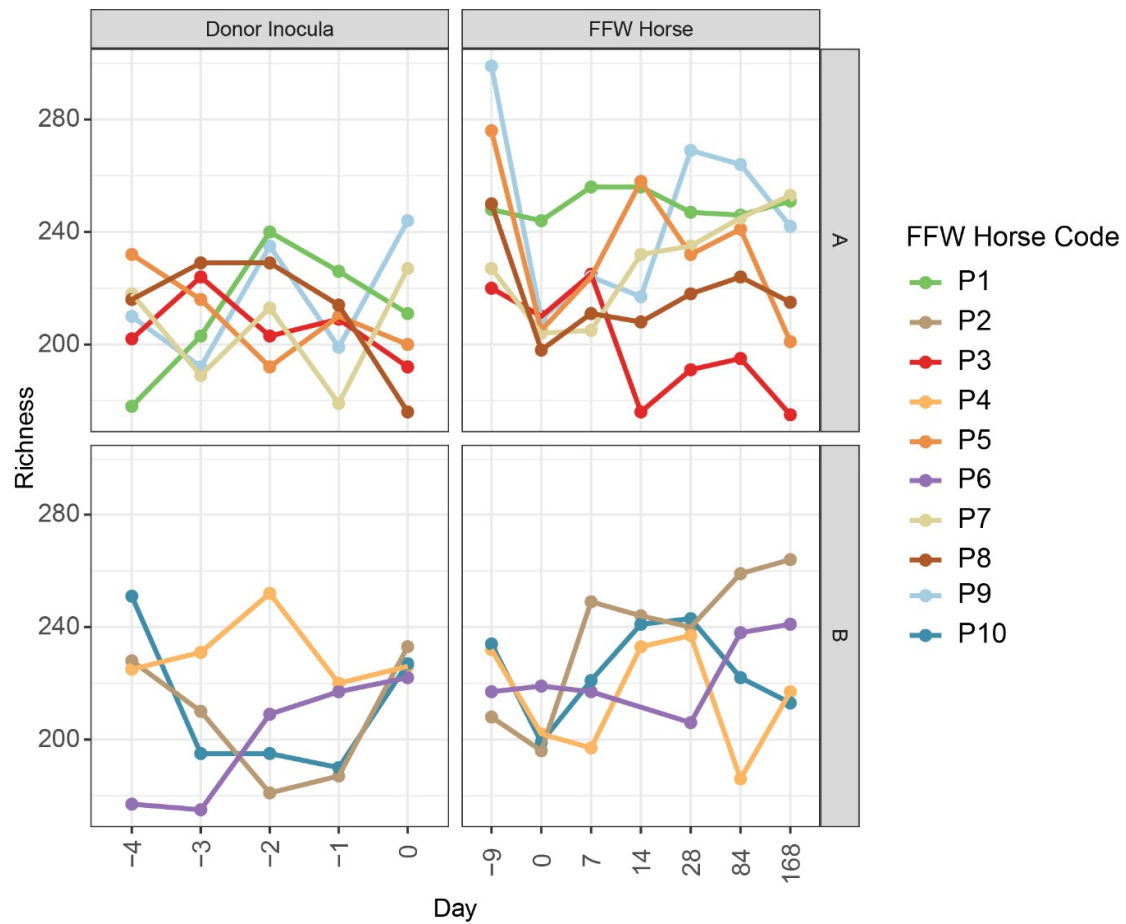

**Figure S4.** Alpha diversity values calculated using the Richness metric for donor inocula and FFW horse faecal microbiota samples. Donor inocula samples are colored by the animal that received them, and all FFW horse related samples are grouped by donor animal used (i.e., donor A or B).

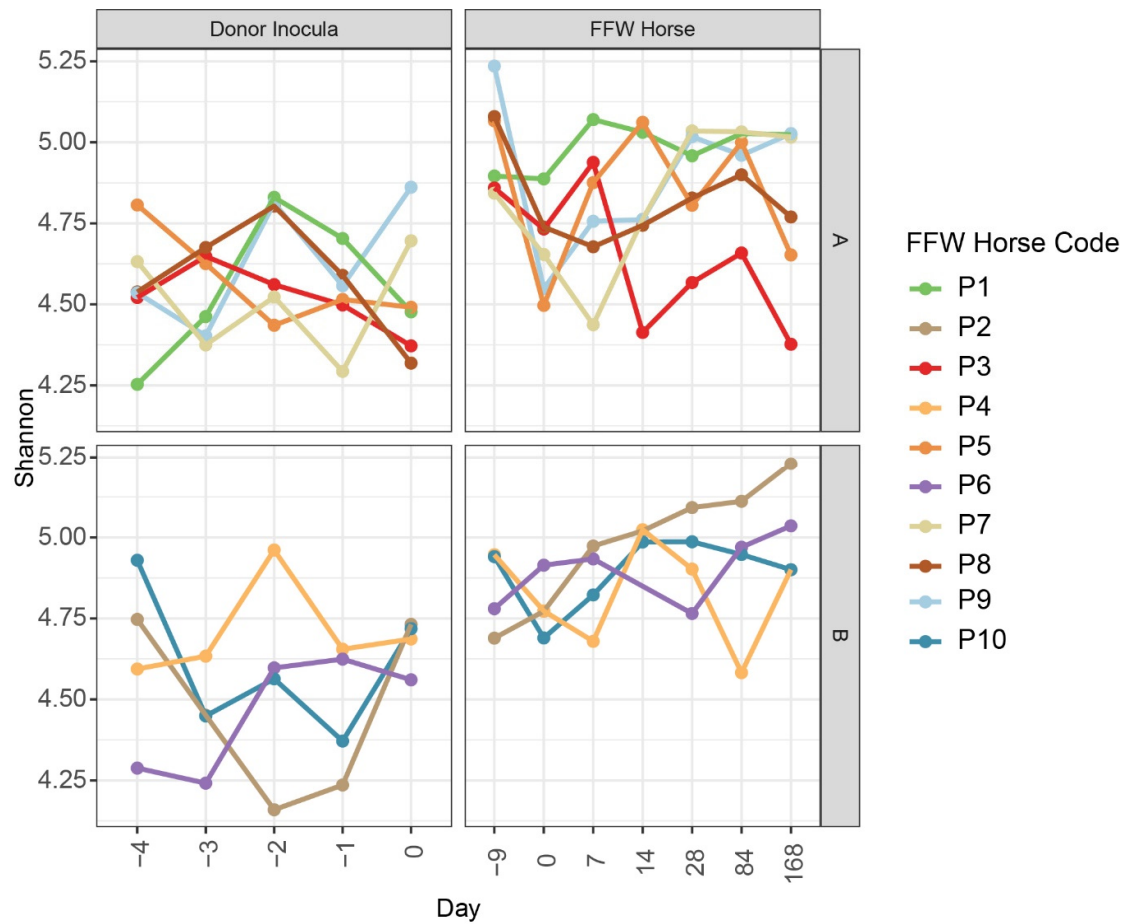

**Figure S5.** Alpha diversity values calculated using the Shannon metric for donor inocula and FFW horse faecal microbiota samples. Donor inocula samples are colored by the animal that received them, and all FFW horse related samples are grouped by donor animal used (i.e., donor A or B).
